# Supplementary material for: Facilitating and inhibiting factors for long-term involvement of patients at outcome conferences—lessons learnt from a decade of collaboration in OMERACT: a qualitative study
Source: HighWire-hosted journal article supplement (doi:10.1136/bmjopen-2013-003311), 2013-08-01

## **Online Table 1**

### **Overview of tasks carried out by patient participants at OMERACT 6-10**

- Act as co-chair of the patient participation workshop;
- Moderate break-out sessions
- Formulate questions for the workshop(s)
- Give a presentation at plenary sessions
- Weight different measures and domains
- Participate in different meetings as full delegates
- Provide input on pre- and post-conference documents
- Participate in workshops on fibromyalgia, gout, psoriatic arthritis, RA, AS and vasculitis
- Edit or contribute to the OMERACT patient newsletter
- Compile and edit the patient information pack and the OMERACT glossary
- Assist researchers to produce summaries suitable for lay participants
- Co-author scientific publications
- Promote topics from the research agenda on a national level
- Guide, support and inspire new patient research partners
- Disseminate the outcomes outside OMERACT.

## Online figure 1

### Rheumatic conditions represented at OMERACT meetings between 2002-2010

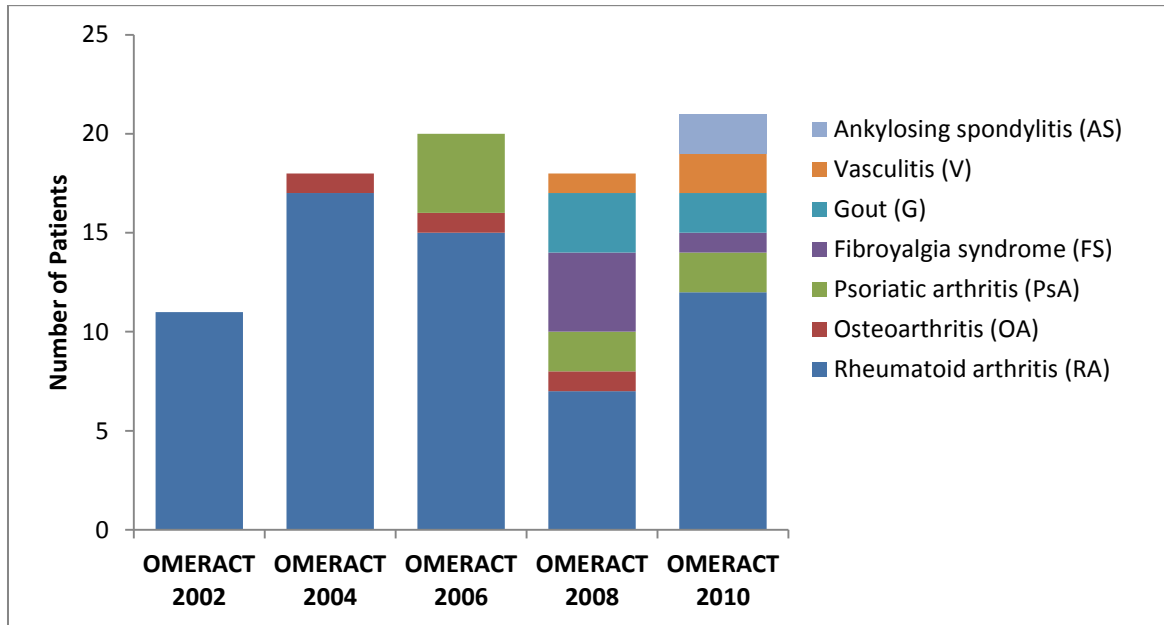

## Online figure 2

### Countries represented at OMERACT meetings between 2002-2010

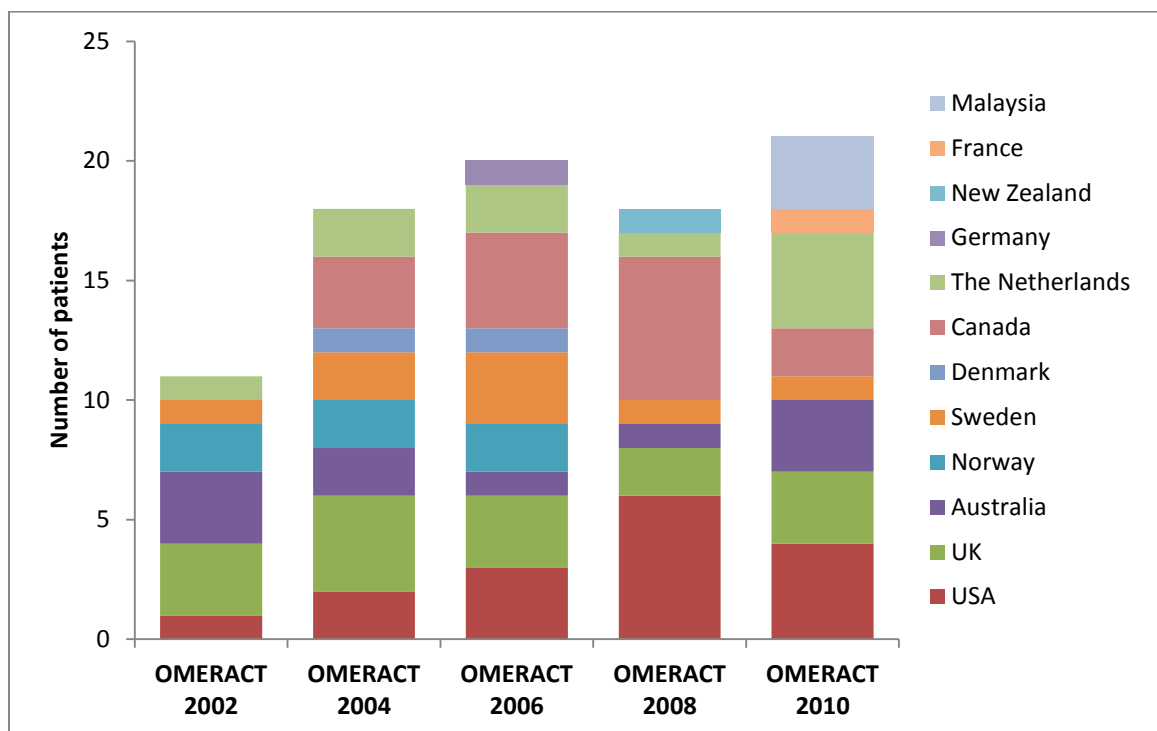

**Online Figure 3**

**Number of times partners attended OMERACT between 2002-2010**

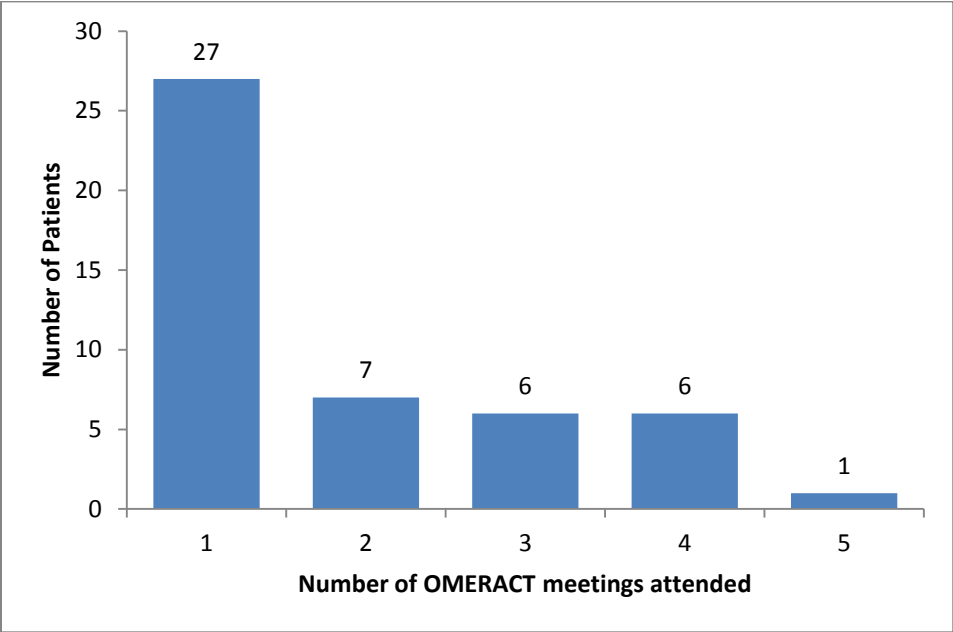

**Online figure 4**

**Number of new versus experienced patient participants between 2002-2010**

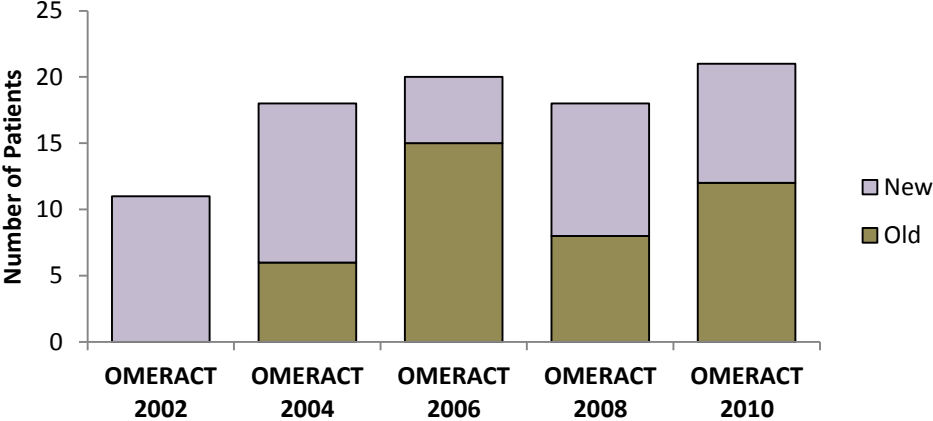

**Online figure 5**

**Gender of the 47 patient participants between 2002-2010**

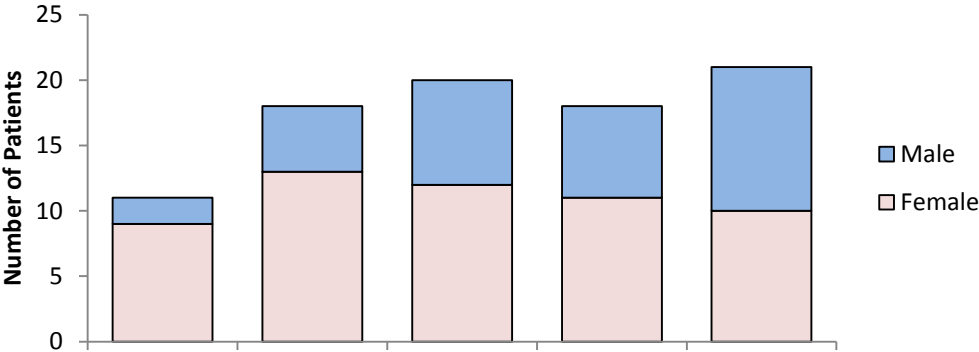

**Online figure 6**

**Programmed patient integration at OMERACT meetings between 2002-2010**

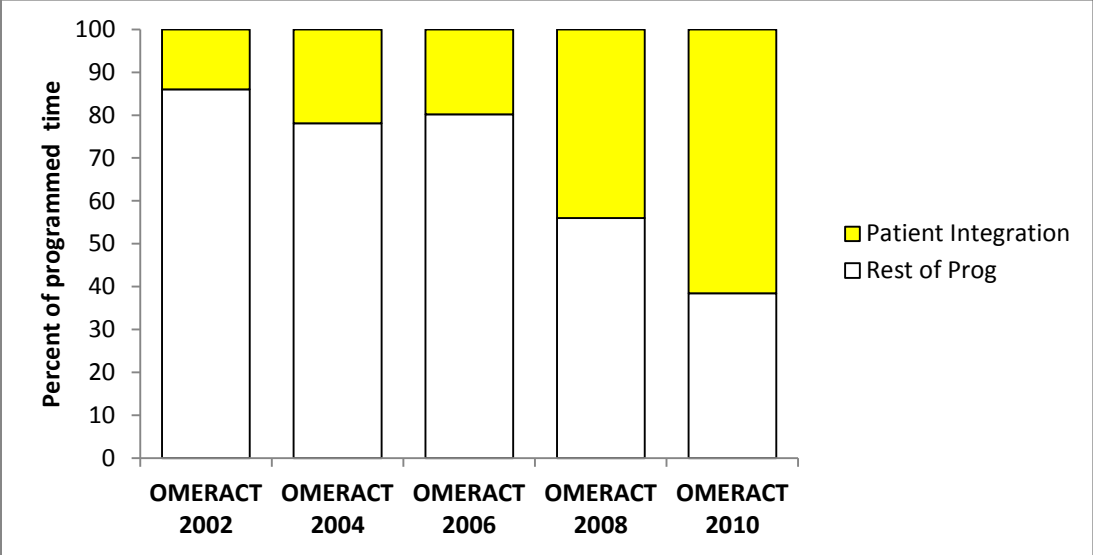

Supplement: bmjopen-2013-003311supp.pdf [file bmjopen-2013-003311supp.pdf]
