# Supplementary material for: Facilitating and inhibiting factors for long-term involvement of patients at outcome conferences—lessons learnt from a decade of collaboration in OMERACT: a qualitative study
Source: HighWire-hosted journal article supplement (doi:10.1136/bmjopen-2013-003311), 2013-08-01
Supplement: bmjopen-2013-003311supp_apppendix.pdf [file bmjopen-2013-003311supp_apppendix.pdf]

**Appendix 1 Example of an audit trail:** Main categories (column 5) derived from the thematic content analysis, partly illustrated for the main categories ‘conference design’ and ‘skepticism’.

| Text fragment                                                                                                                                                                                                                                                                                                                                   | Open coding                                                                                      | Axial coding                                                                                                                           | Sub-categories                                                                                                                                                                                                                  | Main categories                                                                                                                                                                    |                     |
|-------------------------------------------------------------------------------------------------------------------------------------------------------------------------------------------------------------------------------------------------------------------------------------------------------------------------------------------------|--------------------------------------------------------------------------------------------------|----------------------------------------------------------------------------------------------------------------------------------------|---------------------------------------------------------------------------------------------------------------------------------------------------------------------------------------------------------------------------------|------------------------------------------------------------------------------------------------------------------------------------------------------------------------------------|---------------------|
| <ul style="list-style-type: none"> <li>• “as soon as you invite a collaborator, you are on the same team” [RL]</li> <li>• “I felt equal to all others and I was stimulated to participate” [RH]</li> <li>• “as part of the team I was considered an equal co-researcher” [PG]</li> <li>• “I don’t remember feeling us and them” [PM]</li> </ul> | <ul style="list-style-type: none"> <li>• Co-researcher</li> <li>• Equality</li> </ul>            | <ul style="list-style-type: none"> <li>• Participation ladder: partnership</li> <li>• Co-creation</li> <li>• Equality</li> </ul>       | <ul style="list-style-type: none"> <li>• Multi-stakeholder approach</li> <li>• Spirit of OMERACT</li> <li>• <b>Full &amp; equal participation</b></li> <li>• Interactive breakouts</li> <li>• Structural involvement</li> </ul> | <ul style="list-style-type: none"> <li>STRONG LEADERSHIP</li> <li>SELECTION PROCEDURE</li> <li><b>CONFERENCE DESIGN</b></li> <li>MODERATION STYLE</li> <li>PEER SUPPORT</li> </ul> | <b>FACILITATORS</b> |
| <ul style="list-style-type: none"> <li>• “New stakeholders often don’t have knowledge about clinimetry” [RE]</li> <li>• Clinicians who do not accept patients’ influence, are difficult to change [PI]</li> <li>• “there is still an undercurrent that questions the issue of the added value of patient input” [PN]</li> </ul>                 | <ul style="list-style-type: none"> <li>• (low) expectations of patients’ contribution</li> </ul> | <ul style="list-style-type: none"> <li>• Resistance to change</li> <li>• Perspective on potential contributions of patients</li> </ul> | <ul style="list-style-type: none"> <li>• Risk of tokenism</li> <li>• <b>Doubts about added value</b></li> <li>• Imperceptibility of contributions</li> <li>• Lack of continuity</li> </ul>                                      | <ul style="list-style-type: none"> <li>INTENSITY OF THE PROGRAM</li> <li><b>SKEPTICISM</b></li> <li>COMPOSITION PATIENT GROUP</li> </ul>                                           | <b>BARRIERS</b>     |
